# Supplementary material for: Layered roles of fruitless isoforms in specification and function of male aggression-promoting neurons in Drosophila
Source: eLife. 2020 Apr 21;9:e52702. doi: 10.7554/eLife.52702 (PMC7173971; doi:10.7554/eLife.52702)
Supplement: Source data 1. [file elife-52702-data1.xlsx]

## Sheet: Figure1C,D
Figure 1
C1 (Time orienting (sec/min))							C2 (Lunges/minutes)							C3 (Wing extension (sec/min))							D1 (Time orienting (sec/min))							D2 (Lunges/minutes)							D3 (Wing extension (sec/min))
♂ Tk-GAL41, UAS>stop>CsChrimson, Otd-nls:FLPo				♂ Tk-GAL41, UAS>stop>CsChrimson	♂ UAS>stop>CsChrimson, Otd-nls:FLPo		♂ Tk-GAL41, UAS>stop>CsChrimson, Otd-nls:FLPo				♂ Tk-GAL41, UAS>stop>CsChrimson	♂ UAS>stop>CsChrimson, Otd-nls:FLPo		♂ Tk-GAL41, UAS>stop>CsChrimson, Otd-nls:FLPo				♂ Tk-GAL41, UAS>stop>CsChrimson	♂ UAS>stop>CsChrimson, Otd-nls:FLPo		♂ Tk-GAL41, UAS>stop>CsChrimson, Otd-nls:FLPo				♂ Tk-GAL41, UAS>stop>CsChrimson	♂ UAS>stop>CsChrimson, Otd-nls:FLPo		♂ Tk-GAL41, UAS>stop>CsChrimson, Otd-nls:FLPo				♂ Tk-GAL41, UAS>stop>CsChrimson	♂ UAS>stop>CsChrimson, Otd-nls:FLPo		♂ Tk-GAL41, UAS>stop>CsChrimson, Otd-nls:FLPo				♂ Tk-GAL41, UAS>stop>CsChrimson	♂ UAS>stop>CsChrimson, Otd-nls:FLPo
Window 1 (pre-stimulation)	Window 2 (during stimulation)	Window 3 (ISIs)	Window 4 (total post-stimulation)	Window 4 (total post-stimulation)	Window 4 (total post-stimulation)		Window 1 (pre-stimulation)	Window 2 (during stimulation)	Window 3 (ISIs)	Window 4 (total post-stimulation)	Window 4 (total post-stimulation)	Window 4 (total post-stimulation)		Window 1 (pre-stimulation)	Window 2 (during stimulation)	Window 3 (ISIs)	Window 4 (total post-stimulation)	Window 4 (total post-stimulation)	Window 4 (total post-stimulation)		Window 1 (pre-stimulation)	Window 2 (during stimulation)	Window 3 (ISIs)	Window 4 (total post-stimulation)	Window 4 (total post-stimulation)	Window 4 (total post-stimulation)		Window 1 (pre-stimulation)	Window 2 (during stimulation)	Window 3 (ISIs)	Window 4 (total post-stimulation)	Window 4 (total post-stimulation)	Window 4 (total post-stimulation)		Window 1 (pre-stimulation)	Window 2 (during stimulation)	Window 3 (ISIs)	Window 4 (total post-stimulation)	Window 4 (total post-stimulation)	Window 4 (total post-stimulation)
0	48.0667	7.18333	20.8111	7.36852	4.55556		0	4.66667	0.166667	1.66667	0	0		0	0.222222	0	0.0740741	0	0.0685185		5	51.1611	35.9333	41.0093	37.2593	17.5315		0	0	0	0	0	0		0	1.10556	7.00278	5.03704	9.43519	1.89444
6.55	28.2222	9.88889	16	1.58148	19.1296		0	10.6667	1	4.22222	0	0		0	0	0.591667	0.394444	0	0.724074		9	43.9667	41.2444	42.1519	4.30185	50.8259		0	0	0	0	0	0		4.4	2.4	17.1889	12.2593	0.133333	31.3981
2.03333	26.7111	4.73611	12.0611	3.96667	6.29074		0	10.3333	0.666667	3.88889	0	0		0	0.405556	0	0.135185	0.0611111	0.0925926		53.1333	58.5278	38.4556	45.1463	27.0685	35.9407		0	0	0	0	0	0		32.3167	0.172222	26.0722	17.4389	0.464815	5.09074
3.2	48.4444	12.1028	24.2167	1.0037	6.42593		0	5.66667	1.83333	3.11111	0	0		0	0	0.177778	0.118519	0	0.087037		20.5833	55.8667	43.4944	47.6185	52.7574	20.0426		0	0	0	0	0	0		0	0.0666667	2.875	1.93889	21.6444	5.41667
2.45	37.8556	8.93889	18.5778	6.29815	5.10556		0	16	0	5.33333	0	0		0	0.944444	0.177778	0.433333	0.0425926	0.655556		11.5667	56.6222	55.5278	55.8926	33.4074	18.7074		0	0.333333	0	0.111111	0	0		0	3.17778	35.4028	24.6611	1.00926	2.22963
0.75	42.4333	9.3	20.3444	46.3926	4.99074		0	6.66667	0.166667	2.33333	0	0		0	0	0.0222222	0.0148148	0	0.659259		2.6	45.9833	31.6417	36.4222	24.3074	51.7593		0	0	0	0	0	0		0	0	3.44722	2.29815	0	27.1704
2.86667	51.5889	22.2167	32.0074	20.0519	3.27963		0	33.6667	12.6667	19.6667	0	0		0	0	0.136111	0.0907407	0	0		0	21.8167	23.5472	22.9704	33.4796	45.9574		0	0	0	0	0	0		0	1.14444	1.35833	1.28704	3.44259	5.3037
4.1	51.8667	10	23.9556	0	1.75926		0	22	0.666667	7.77778	0	0		0	0	0	0	0	0		35.05	58.4389	35.7944	43.3426	59.4741	52.737		0	0	0	0	0	0		6.75	0	5.575	3.71667	39.4259	28.9056
0	34.9611	7.04722	16.3519	1.51296	6.93333		0	1.66667	0.166667	0.666667	0	0		0	0.4	0	0.133333	0	0		5.85	39.7889	32.4083	34.8685	22.2056	18.8685		0	0	0	0	0	0		0	1.71111	5.33333	4.12593	3.16852	2.35741
14.7	41.3444	13.0472	22.4796	26.9037	6.65556		0	8.33333	0.5	3.11111	0	0		3.35	0.133333	0.0611111	0.0851852	0	0.344444		14.85	52.4222	53.3667	53.0519	40.5259	26.7444		0	0	0	0	0	0		0	0.45	17.9806	12.137	14.2685	2.11296
1.95	41.6889	12.5111	22.237	6.91481	3.06481		0	29.3333	2.66667	11.5556	0	0.111111		0	0	0	0	0.942593	3.78889		53.7	46.05	52.6361	50.4407	58.4907	13.4537		0	0	0	0	0	0		6.26667	0.883333	14.4889	9.9537	37.0704	1.84074
14.6	48.4722	3.78889	18.6833	19.8148	8.16111		0	11	0.5	4	0	0		0	0.138889	0	0.0462963	0	0.746296		23.4333	45.4944	52.8417	50.3926	36.7741	32.6315		0	0	0	0	0	0		12.55	0	21.8083	14.5389	7.24259	3.76852
2.71667	29.4611	6.78889	14.3463	1.56296	14.7537		0	14.6667	0.166667	5	0	0		0.35	0.0444444	0	0.0148148	0	0		5.53333	46.0111	34.325	38.2204	19.2444	33.5259		0	0	0	0	0	0		2.03333	0	4.59167	3.06111	1.09444	11.4204
3.23333	43.2889	3.26111	16.6037	2.20185	44.7537		0	31.6667	1.33333	11.4444	0	0.222222		0	0	0	0	0	16.6667		19.15	59.6667	30.0333	39.9111	32.6981	31.1056		0	0	0	0	0	0		10.6167	0.305556	4.43889	3.06111	10.9556	5.44259
29	50.0833	19.4667	29.6722	2.41111	9.2963		0	15.3333	2.33333	6.66667	0	0		0	0.122222	0	0.0407407	0.0851852	0.138889		47.6167	59.3056	32.0194	41.1148	33.9963	28.6519		0	0	0	0	0	0		0	0	0.0722222	0.0481481	5.43333	3.77222
2.48333	43.9611	17.2694	26.1667	5.19444	8.51481		0	26.3333	3.33333	11	0	0.111111		0	0	0.241667	0.161111	0	0.296296		34.6	59.6889	30	39.8963	9.96852	23.8667		0	0	0	0	0	0		6.81667	0	0	0	0	9.43148
13.3833	50.3222	37.9194	42.0537	6.70556	8.9463		0	5	7.16667	6.44444	0	0		0	0	0	0	0	0.0777778		0	53.6333	13.3194	26.7574	10.9796	21.737		0	0	0	0	0	0		0	5.54444	1.41111	2.78889	0.883333	4.66111
12	50.6611	19.1528	29.6556	3.61852	8.8		0	9.33333	9.16667	9.22222	0	0		0.883333	0.0388889	0	0.012963	0	0.507407		10.35	52.4556	22.5806	32.5389	3.92593	18.2593		0	0	0	0	0	0		0	0	2.71944	1.81296	0.0981481	4.96852
5.83333	31.5944	18.6917	22.9926	13.1019	7.75741		0	12	3.5	6.33333	0	0		0	0.366667	0.383333	0.377778	0	1.03148		13.4833	57.6611	41.4	46.8204	21.1444	52.4963		0	0	0	0	0	0		1.45	0.405556	0.569444	0.514815	0.414815	40.537
6.96667	41.5833	16.5833	24.9167	8.87778	9.69074		1	10.3333	2.16667	4.88889	0.111111	0		2.63333	0.322222	0.477778	0.425926	0	0.681481		20.7667	44.0333	22	29.3444	30.2833	14.2667		0	0	0	0	0	0		1.61667	0.422222	5.48889	3.8	4.84074	1.08519
17.6333	37.7611	24.1944	28.7167	8.69074	9.81852		0	11	2.66667	5.44444	0	0		0.383333	1.03333	3.71944	2.82407	0.111111	0.864815		2.8	56.2333	25.4583	35.7167	7.73333	36.9481		0	0	0	0	0	0		0	0.866667	4.01944	2.96852	0	6.29815
5.73333	49.4778	6.73056	20.9796	2.47593	4.45741		0	0.333333	0	0.111111	0	0		0	0	0	0	0.0388889	0.0537037		3.41667	41.3833	3.06944	15.8407	8.42593	6.7537		0	0	0	0	0	0		0	0.677778	0	0.225926	0	2.01667
3.75	18.1722	15.5194	16.4037	5.49074	5.15185		0	1.33333	0.333333	0.666667	0	0		0.35	0	1.39444	0.92963	0.581481	0.05		32.4667	57.9278	25.4917	36.3037	30.0722	33.8759		0	0	0	0	0	0		6.3	0.266667	0.413889	0.364815	3.86852	2.94444
11.8167	43.5444	8.91111	20.4556	11.3	12.7315		0	0	0	0	0	0		0.666667	0.633333	0	0.211111	0.118519	1.5463		17.2167	34.1167	11.6194	19.1185	5.7963	10.9833		0	0	0	0	0	0		6.21667	4.84444	1.16389	2.39074	0	1.86111
6.75	39.3722	7.25556	17.9611	2.01111	7.67037		0	2.66667	0	0.888889	0	0		0	0	0	0	0.0333333	0		31.1833	59.5333	31.6528	40.9463	38.7556	33.2759		0	0	0	0	0	0		2.08333	0	0	0	3.44815	14.7556
1.96667	22.4056	12.4806	15.7889	6.57407	9.8463		0	5.33333	2.16667	3.22222	0.111111	0		0	2.97778	0.897222	1.59074	0.0722222	0.207407		0.583333	49.5444	26.6278	34.2667	14.4444	26.3667		0	0	0	0	0	0		0	0.0388889	2.45	1.6463	0.387037	2.18148
9.71667	49.6	12.5889	24.9259	1.64074	41.8981		0	0.666667	1	0.888889	0	0		0	0	0.716667	0.477778	0	2.33333		15.7667	43.4889	22.8778	29.7481	31.0704	9.58889		0	0	0	0	0	0		1.03333	0.0944444	0.458333	0.337037	0.762963	0.2
1.46667	17.8167	8.04722	11.3037	2.95926	37.5444		0	6.33333	0.166667	2.22222	0	0		0	3.31667	0	1.10556	0.242593	20.0704		0	57.4333	13.6917	28.2722	20.2648	29.9204		0	0	0	0	0	0		0	0.216667	0.588889	0.464815	0.940741	5.09259
2.85	37.2667	9.11667	18.5	5.32037	11.0889		0	1	0	0.333333	0	0		0	0.0722222	0	0.0240741	0.257407	2.49259		18.7333	54.8333	35.6917	42.0722	23.5352	19.1796		0	0	0	0	0	0		1.48333	0	0.661111	0.440741	1.03889	1.14259
0.566667	24.0389	5.43889	11.6389	8.74444	7.71296		0	0	0	0	0	0		0	1.26111	0.119444	0.5	0.0148148	0.601852		8.95	55.4611	28.4472	37.4519	10.3278	22.8389		0	0	0	0	0	0		3.15	0.0388889	5.725	3.82963	0.133333	5.78519
39.15	48.2222	23.4278	31.6926	5.56111	10.6574		0	9.33333	0.166667	3.22222	0	0		25.3333	0.122222	3.48056	2.36111	0.864815	0.0333333		27.0667	53.3389	46.4583	48.7519	16.9556	37.7037		0	0	0	0	0	0		4.81667	0.272222	10.6861	7.21481	2.28889	3.50926
4.83333	44.5722	10.275	21.7074	2.17037	16.8519		0	16.6667	0.666667	6	0	0		0	0	0	0	0	5.56296		21.8667	48.7722	23.2917	31.7852	19.7111	34.7463		0	0	0	0	0	0		0	0.227778	1.81667	1.28704	1.15556	4.45926
6.58333	46.1944	11.8806	23.3185	8.74444	38.7667		0	16.6667	1.33333	6.44444	0	1.33333		3.58333	0	0.116667	0.0777778	0	11.3759
37.3333	54.0556	22.325	32.9019	6.96296	6.52222		0	8.33333	1.5	3.77778	0.111111	0		9.56667	0.183333	0.841667	0.622222	0	0.27037		Within genotype Tk-GAL41, UAS>stop>CsChrimson, Otd-nls:FLPo:							Within genotype Tk-GAL41, UAS>stop>CsChrimson, Otd-nls:FLPo:							Within genotype Tk-GAL41, UAS>stop>CsChrimson, Otd-nls:FLPo:
8.3	14.6889	8.17222	10.3444	11.9519	5.65185		0	1.33333	0.166667	0.555556	0	0		0	0	0.102778	0.0685185	0	0		Statistical comparisons among time windows 1-3							Statistical comparisons among time windows 1-3							Statistical comparisons among time windows 1-3
50.7833	49.5278	37.7639	41.6852	4.08889	4.0037		0	9.33333	3.66667	5.55556	0	0		40.75	1.29444	19.1583	13.2037	0.0481481	0
2.06667	22.3389	15.4722	17.7611	2.97593	4.66481		0	2.66667	0.666667	1.33333	0	0		0	0.133333	0.111111	0.118519	0	0		Kruskal-Walis one-way ANOVA ('kruskalwallis') among windows 1-3							Kruskal-Walis one-way ANOVA ('kruskalwallis') among windows 1-3							Kruskal-Walis one-way ANOVA ('kruskalwallis') among windows 1-3
3.41667	38.6833	14.8833	22.8167	5.73519	8.62778		0	13.6667	0.166667	4.66667	0	0		0.816667	0.25	0	0.0833333	0	0.512963		4.92752e-12							0.367879							0.000337079
9.36667	20.0222	17.1222	18.0889	4.68333	5.83519		0	1	0.166667	0.444444	0	0		0	0.0555556	0	0.0185185	0	0.122222		Wilcoxon signed rank test ('signrank')														Wilcoxon signed rank test ('signrank')
0	36.6056	19.7417	25.363	5.67778	21.8296		0	9.33333	2.83333	5	0	0		0.266667	0.133333	0.658333	0.483333	0.0425926	1.20556		1 vs. 2	2 vs. 3													1 vs. 2	2 vs. 3
41.6667	57.05	37.525	44.0333	6.62778	5.11667		0	10	1	4	0	0		26.0167	0.183333	8.53056	5.74815	0	0		9.62657e-07	3.52927e-06													0.0168776	8.54217e-05
4.66667	45.9444	9.28889	21.5074	6.08889	6.49259		0	17	0.833333	6.22222	0	0		0	0	0	0	0.0907407	0
0	44.0611	8.33889	20.2463	4.53148	6.80556		0	29.3333	0.666667	10.2222	0	0		0	0.211111	0	0.0703704	0	0
4.11667	41.2944	50.8583	47.6704	6.09815	11.5093		0	24.6667	1.33333	9.11111	0	0		0	0.133333	22.8639	15.287	0	0		Across-genotype comparison							Across-genotype comparison							Across-genotype comparison
7.08333	45.2056	8.11111	20.4759	4.43148	7.54259		0	2.33333	0.333333	1	0	0		0	0	0	0	0	0
4.71667	21.7889	12.9556	15.9	11.7315	10.9389		0	3.66667	0	1.22222	0	0		0	0	0.0916667	0.0611111	0	1.0037		Kruskal-Walis one-way ANOVA ('kruskalwallis')							Kruskal-Walis one-way ANOVA ('kruskalwallis')							Kruskal-Walis one-way ANOVA ('kruskalwallis')
9.83333	25.15	6.075	12.4333	9.25	13.2111		0	15	0.5	5.33333	0	0		0.116667	0	0	0	0	1.23519		0.000239542							0.367879							0.0304274
3.16667	39.5056	6.56667	17.5463	9.90556	6.52963		0	20	1.16667	7.44444	0	0		0	0	0	0	0	0		Mann-Whitney U test ('ranksum')
6.26667	45.3889	9.43611	21.4204	8.02778	9.34074		0	0.333333	0.166667	0.222222	0	0		7.71667	2.62222	0.0694444	0.92037	0	0.175926		Tk-GAL41, UAS>stop>CsChrimson, Otd-nls:FLPo vs. Tk-GAL41, UAS>stop>CsChrimson
18.9833	43.9778	13.4917	23.6537	3.67593	14.3241		0	4.33333	0.333333	1.66667	0	0		8.13333	0.611111	1.15278	0.972222	0	0.244444		0.000194515
0	55.7167	17.3778	30.1574	5.41667	10.4056		0	10	0.333333	3.55556	0	0.111111		0	1.43333	0.0638889	0.52037	0	0.874074		Tk-GAL41, UAS>stop>CsChrimson, Otd-nls:FLPo vs. UAS>stop>CsChrimson, Otd-nls:FLPo
13.9833	46.5389	13.8194	24.7259	5.22778	6.24074		0	6.33333	1.33333	3	0	0		4.13333	0.05	0.205556	0.153704	0	0.0981481		0.0013008
42.5167	39.0278	12.9083	21.6148	NaN	4.90185		0	12	1.16667	4.77778	NaN	0		24.0667	0	0	0	NaN	0.275926
1.9	24.1111	7.75556	13.2074	NaN	NaN		0	2	1.5	1.66667	NaN	NaN		0	0	0.0388889	0.0259259	NaN	NaN
Within genotype Tk-GAL41, UAS>stop>CsChrimson, Otd-nls:FLPo:							Within genotype Tk-GAL41, UAS>stop>CsChrimson, Otd-nls:FLPo:							Within genotype Tk-GAL41, UAS>stop>CsChrimson, Otd-nls:FLPo:
Statistical comparisons among time windows 1-3							Statistical comparisons among time windows 1-3							Statistical comparisons among time windows 1-3
Kruskal-Walis one-way ANOVA ('kruskalwallis') among windows 1-3							Kruskal-Walis one-way ANOVA ('kruskalwallis') among windows 1-3							Kruskal-Walis one-way ANOVA ('kruskalwallis') among windows 1-3
2.51275e-21							3.14494e-26							0.607169
Wilcoxon signed rank test ('signrank')							Wilcoxon signed rank test ('signrank')
1 vs. 2	2 vs. 3						1 vs. 2	2 vs. 3
1.9244e-10	2.27649e-10						3.48851e-10	9.09344e-10
Across-genotype comparison							Across-genotype comparison							Across-genotype comparison
Kruskal-Walis one-way ANOVA ('kruskalwallis')							Kruskal-Walis one-way ANOVA ('kruskalwallis')							Kruskal-Walis one-way ANOVA ('kruskalwallis')
2.33108e-18							1.79016e-28							9.15022e-08
Mann-Whitney U test ('ranksum')							Mann-Whitney U test ('ranksum')							Mann-Whitney U test ('ranksum')
Tk-GAL41, UAS>stop>CsChrimson, Otd-nls:FLPo vs. Tk-GAL41, UAS>stop>CsChrimson							Tk-GAL41, UAS>stop>CsChrimson, Otd-nls:FLPo vs. Tk-GAL41, UAS>stop>CsChrimson							Tk-GAL41, UAS>stop>CsChrimson, Otd-nls:FLPo vs. Tk-GAL41, UAS>stop>CsChrimson
2.11394e-15							1.70368e-19							1.46811e-06
Tk-GAL41, UAS>stop>CsChrimson, Otd-nls:FLPo vs. UAS>stop>CsChrimson, Otd-nls:FLPo							Tk-GAL41, UAS>stop>CsChrimson, Otd-nls:FLPo vs. UAS>stop>CsChrimson, Otd-nls:FLPo							Tk-GAL41, UAS>stop>CsChrimson, Otd-nls:FLPo vs. UAS>stop>CsChrimson, Otd-nls:FLPo
1.63399e-12							4.27294e-19							0.262602

## Sheet: Figure1K,N-P
Figure 1
K (Tk-GAL4FruM neurons)												N (Medial projection volumes: µm3)					O (Anterior projection volumes : µm3)					P (Lateral projection volumes: µm3)
fru locus	+/+		+/fru4-40		fruM/fru4-40		fruF/fru4-40				fru locus	+/+	fruM/fru4-40	fruM/fru4-40		fru locus	+/+	fruM/fru4-40	fruM/fru4-40		fru locus	+/+	fruM/fru4-40	fruM/fru4-40
sex chromosome	XY	XX	XY	XX	XY	XX	XY	XX			sex chromosome	XY	XY	XX		sex chromosome	XY	XY	XX		sex chromosome	XY	XY	XX
	6	0	6	0	6	5	0	0				5609	3277	6936			7137	6590	5542			982	1121	702
	6	0	6	0	6	5	0	0				4644	7465	4720			4718	2873	4118			761	1031	747
	6	0	6	0	6	5	0	0				3530	5234	7092			3867	2798	6128			689	782	719
	5	0	6	0	6	7	0	0				4238	4490	3751			7728	6644	4189			1440	696	760
	6	0	5	0	6	5	0	0				5540	8355	3893			8282	5861	4353			1046	707	559
	6	0	6	0	6	5	0	0				7078	7432	7897			6049	3856	5165			1021	722	731
	6	0	5	0	5	5	0	0				6506		7005			2815		7917			730		1160
	6	0	6	0	6	5	0	0				4173		3385			8515		4785			1057		1027
	6		6		6		0					4646					6333					886
	5		6		6		0					5612					4140					989
	5		5		6		0
	5		5		5		0
AVERAGE	5.66667	0	5.66667	0	5.83333	5.25	0	0				Kruskal-Walis one-way ANOVA ('kruskalwallis')					Kruskal-Walis one-way ANOVA ('kruskalwallis')					Kruskal-Walis one-way ANOVA ('kruskalwallis')
S.D.	0.492366	0	0.492366	0	0.389249	0.707107	0	0				0.637203					0.449816					0.353101
	One-way ANOVA ('anova1') among genotypes
	1.30065e-61
Tukey's honest significant difference test ('hsd'): p-value table
(Significant group, p < 0.01)		a	b	a	b	a	a	b	b
fru locus		+/+		+/fru4-40		fruM/fru4-40		fruF/fru4-40
	sex chromosome	XY	XX	XY	XX	XY	XX	XY	XX
+/+	XY		5.98812e-08	1	5.98812e-08	0.961161	0.261841	5.98812e-08	5.98812e-08
	XX			5.98812e-08	1	5.98812e-08	5.98812e-08	1	1
+/fru4-40	XY				5.98812e-08	0.961161	0.261841	5.98812e-08	5.98812e-08
	XX					5.98812e-08	5.98812e-08	1	1
fruM/fru4-40	XY						0.0270247	5.98812e-08	5.98812e-08
	XX							5.98812e-08	5.98812e-08
fruF/fru4-40	XY								1
	XX

## Sheet: FigureS1-1C,D
Figure 1 - figure supplement 1
	C1 (Time orienting (sec/min))						C2 (Lunges/min)						C3 (Wing extension (sec/min))							B1 (Velocity (mm/sec))						B2 (Lunges/min)						B3 (Wing extension (sec/min))
LED frequency	30	10	5	2	1	LED frequency	30	10	5	2	1	LED frequency	30	10	5	2	1		fru locus	+/+	+/fru4-40	fruM/fru4-40	fruM/fru4-40	fruM/fru4-40	fru locus	+/+	+/fru4-40	fruM/fru4-40	fruM/fru4-40	fruM/fru4-40	fru locus	+/+	+/fru4-40	fruM/fru4-40	fruM/fru4-40	fruM/fru4-40
♂ Tk-GAL41, UAS>stop>CsChrimson, Otd-nls:FLPo	Window 4 (total post-stimulation)	Window 4 (total post-stimulation)	Window 4 (total post-stimulation)	Window 4 (total post-stimulation)	Window 4 (total post-stimulation)		Window 4 (total post-stimulation)	Window 4 (total post-stimulation)	Window 4 (total post-stimulation)	Window 4 (total post-stimulation)	Window 4 (total post-stimulation)		Window 4 (total post-stimulation)	Window 4 (total post-stimulation)	Window 4 (total post-stimulation)	Window 4 (total post-stimulation)	Window 4 (total post-stimulation)			♂ Tk-GAL41, UAS>stop>CsChrimson, Otd-nls:FLPo	♂ Tk-GAL41, UAS>stop>CsChrimson, Otd-nls:FLPo	♂ Tk-GAL41, UAS>stop>CsChrimson, Otd-nls:FLPo	♂ Tk-GAL41, UAS>stop>CsChrimson	♂ UAS>stop>CsChrimson, Otd-nls:FLPo		♂ Tk-GAL41, UAS>stop>CsChrimson, Otd-nls:FLPo	♂ Tk-GAL41, UAS>stop>CsChrimson, Otd-nls:FLPo	♂ Tk-GAL41, UAS>stop>CsChrimson, Otd-nls:FLPo	♂ Tk-GAL41, UAS>stop>CsChrimson	♂ UAS>stop>CsChrimson, Otd-nls:FLPo		♂ Tk-GAL41, UAS>stop>CsChrimson, Otd-nls:FLPo	♂ Tk-GAL41, UAS>stop>CsChrimson, Otd-nls:FLPo	♂ Tk-GAL41, UAS>stop>CsChrimson, Otd-nls:FLPo	♂ Tk-GAL41, UAS>stop>CsChrimson	♂ UAS>stop>CsChrimson, Otd-nls:FLPo
	8.9037	22.1907	27.0611	18.7611	6.18333		0.777778	3.55556	4.77778	4.11111	0		0	1.60833	1.26111	0	0			2.41448	1.88207	2.10869	1.81005	2.95174		0	0	0	0	0		0	0	0.157407	0	0.0407407
	16.0111	9.98704	16.8796	22.1833	12.1704		7.11111	1.88889	8.33333	4.88889	2		0.135185	0.0638889	0.375	0.0555556	0			1.71123	2.48454	1.80551	0.981165	1.98175		0	0	0	0	0		0	0.0592593	0.0277778	0	0
	26.9241	9.82407	18.1611	23.3852	19.0593		16.2222	2	11.6667	13.3333	1.33333		0.681481	0.0472222	0	0.0722222	0			3.38527	2.63322	1.78536	2.18819	2.66311		0	0	0	0	0		0	0.0537037	0.0333333	0	0
	32.8333	14.7333	32.8241	24.95	20.4074		21.6667	9	11.7778	16.4444	5		1.30556	0	5.05833	0	0			3.88045	2.04834	1.95423	2.67996	2.10591		0	0	0	0	0		0.509259	0	0	0	0
	13.1815	0.203704	11.95	29.3426	16.6444		4.22222	0	0	5.22222	3.66667		0.475926	0	0	0	0			3.15711	1.56119	1.60359	2.01852	3.15877		0	0	0	0	0		0	0.0148148	0	0	0
	11.1167	16.4889	27.0296	49.1111	3.51852		2	7.11111	8	2.77778	0.222222		0.638889	0.0222222	0.383333	2.47222	0.577778			2.94067	3.8092	2.83798	3.79162	3.32288		0	0	0	0	0		0	0	0.288889	0	0.012963
	11.8426	11.8981	17.7741	37.2148	28.5889		2.77778	1.66667	8.77778	7.22222	15.1111		0.0796296	0.425	0.0833333	1.26111	0			3.04913	4.66384	4.93643	3.42944	3.46385		0	0	0	0	0		0	0	0.0518519	0.012963	0
	28.4611	19.0648	33.4685	23.4667	13.5611		4.77778	8.88889	7.88889	9.88889	2.88889		3.87222	0.380556	0.469444	0	0.0833333			3.70203	3.2312	3.56173	3.0859	3.04943		0	0	0	0	0		0	0.296296	0.118519	0	0.0851852
	11.6556	16.0537	22.6352	38.9093	23.7222		2.11111	5.22222	8.66667	4.44444	2.88889		0.255556	0.0583333	0.647222	0	0.752778			6.39126	3.80396	5.96166	3.45179	3.3725		0	0	0	0	0		0	0.442593	0.0259259	0.8	0
	20.7815	25.4796	25.7574	22.4204	7.32037		0.666667	2.55556	21.1111	4.22222	0.333333		0.672222	1.70278	0.0194444	0.025	0			2.98747	6.6445	1.03449	4.23546	6.44045		0	0	0	0	0		0.0944444	0	0	0.05	0.966667
	42.7389	19.2741	33.8093	13.0722	14.0852		11.1111	4.55556	15.1111	1.33333	7.11111		9.41667	0.175	0.0194444	1.62222	0			3.30958	2.50595	2.54612	3.95677	3.81299		0	0	0	0	0		0.0481481	0	0	0	0.0444444
	18.0167	25.1537	24.2185	28.7019	14.9778		14.1111	4	4.55556	9.11111	2.33333		0.240741	0.891667	0	0.0222222	0			2.66947	2.56026	2.34028	5.10582	2.28992		0	0	0	0	0		0	0	0	10.9259	0
	7.57963	13.3426	21.4722	46.9167	19.0907		1	3.77778	9.44444	12.4444	4.11111		0.388889	0.477778	0.0222222	6.1	1.29722			3.40806	3.54886	2.56115	3.91955	5.6362		0	0	0	0	0		0.0222222	0.146296	0	0	0
	16.5315	38.2352	22.7315	25.4074	48.6778		5.88889	15.3333	5.66667	13	3.88889		0.0314815	2.7	0.0638889	0.1	5.56944			4.07418	4.36668	3.52902	3.01487	2.21836		0	0	0	0	0		0	0.0925926	0.0388889	0.0185185	0
	9.3963	25.6093	20.1148	32.987	19.0981		1.11111	4.22222	6.33333	7.77778	12.1111		0.457407	4.43889	0.0444444	0	0			5.33856	3.77642	2.83968	3.71584	5.22584		0	0	0	0	0		0.312963	0	0.135185	0.105556	0.0277778
	5.94815	32.2056	32.0167	20.1704			0.555556	12.1111	14.7778	4.88889			0.0518519	0.633333	0.502778	0				2.07303	4.1963	3.03252	3.80432	4.08307		0	0	0	0	0		0	0	0	0.0296296	0.0277778
	21.3852	19.9259	26.0611	23.9352			4	8.33333	12.5556	12.8889			2.16296	1.63056	0	0
	2.96667	18.4241	15.7037	23.4167			0.333333	5.66667	1.55556	14.5556			0	0.291667	0	0.238889				Across-genotype comparison		Across-genotype comparison					Across-genotype comparison		Across-genotype comparison				Across-genotype comparison		Across-genotype comparison
	24.4685	14.6889	14.8926	23.6			7.44444	2.55556	6.55556	12.8889			4.79074	0.0916667	0.0388889	0.105556				(among Tk-GAL41, UAS>stop>CsChrimson, Otd-nls:FLPo)		(among fruM/fru4-40)					(among Tk-GAL41, UAS>stop>CsChrimson, Otd-nls:FLPo)		(among fruM/fru4-40)				(among Tk-GAL41, UAS>stop>CsChrimson, Otd-nls:FLPo)		(among fruM/fru4-40)
	24.9741	10.3574	23.887	28.3722			7.11111	2.44444	4.11111	15.3333			2.68333	0.0972222	1.07222	0.0694444				Kruskal-Walis one-way ANOVA ('kruskalwallis')		Kruskal-Walis one-way ANOVA ('kruskalwallis')					Kruskal-Walis one-way ANOVA ('kruskalwallis')		Kruskal-Walis one-way ANOVA ('kruskalwallis')				Kruskal-Walis one-way ANOVA ('kruskalwallis')		Kruskal-Walis one-way ANOVA ('kruskalwallis')
	17.2463		12.8278				2.33333		6.11111				2.74074		0.0638889					0.154484		0.141875					1		1				0.55481		0.617795
	14.213						5						0
	10.7259						0.222222						0.501852
	12.0093						0.666667						0.472222
	12.5907						0.666667						0.598148
	12.5574						3.22222						0.0277778
	16.0944						5.66667						0.590741
	18.863						2.66667						0.0148148
	9.98704						1						0.453704
	12.1704						2.33333						0.440741
	12.137						2						0.177778
	17.7111						6						0.238889

## Sheet: FigureS1-2M
Figure 1 - figure supplement 2
	D (# of cells)								N1 (Time orienting (sec/min))						N2 (Lunges/min)						N3 (Wing extension (sec/min))
	DsM+, FruM+	DsxM+, FruM-	DsM-, FruM+	DsxM-, FruM-	Tk-GAL4FruM neurons Total		♂ Tk-GAL41, UAS>stop>CsChrimson, Otd-nls:FLPo	fru locus	+/+	+/fru4-40 (same as in Figure 1C1)	fruM/fru4-40	+/+	+/fru4-40 (same as in Figure 1D1)		+/+	+/fru4-40 (same as in Figure 1C2)	fruM/fru4-40	+/+	+/fru4-40 (same as in Figure 1D2)		+/+	+/fru4-40 (same as in Figure 1C3)	fruM/fru4-40	+/+	+/fru4-40 (same as in Figure 1D3)
	0	0	5	0	5			Target	Wild-type ♂			Wild-type ♀			Wild-type ♂			Wild-type ♀			Wild-type ♂			Wild-type ♀
	0	0	6	0	6				25.4648	20.8111	30.7185	34.55	41.0093		6.55556	1.66667	27	0	0		0.0425926	0.0740741	0.348148	6.15	5.03704
	0	0	6	0	6				23.763	16	45.1426	56.4889	42.1519		2.77778	4.22222	41.4444	0	0		0	0.394444	0.037037	15.0019	12.2593
	0	0	6	0	6				19.8259	12.0611	22.4519	17.9037	45.1463		7.77778	3.88889	8.55556	0	0		0.0277778	0.135185	0	5.8	17.4389
	0	0	6	0	6				23.2852	24.2167	19.8944	31.8	47.6185		6.55556	3.11111	15.7778	0	0		0.174074	0.118519	0.0759259	3.98704	1.93889
	0	0	6	0	6				21.3426	18.5778	34.1852	53.2926	55.8926		2.66667	5.33333	28.6667	0	0.111111		0	0.433333	0.0296296	12.837	24.6611
	0	0	5	0	5				17.8204	20.3444	20.0704	29.25	36.4222		8.22222	2.33333	12.7778	0	0		0.277778	0.0148148	0.107407	3.22407	2.29815
	0	0	5	0	5				18.5259	32.0074	19.6185	22.6333	22.9704		9.66667	19.6667	12	0	0		0	0.0907407	0.0240741	0.635185	1.28704
	0	0	5	0	5				23.1037	23.9556	8.54259	22.2056	43.3426		13.8889	7.77778	3.44444	0	0		0.183333	0	0.0185185	2.19259	3.71667
	0	0	5	0	5				16.8185	16.3519	42.05	36.1407	34.8685		3.55556	0.666667	19.4444	0	0		0.012963	0.133333	0.287037	5.08333	4.12593
	0	0	5	0	5				23.3944	22.4796	10.7556	25.5722	53.0519		7.55556	3.11111	2.22222	0	0		0.281481	0.0851852	0	4.47407	12.137
	0	0	6	0	6				38.7463	22.237	13.3	33.8204	50.4407		21.5556	11.5556	5.77778	0	0		0.287037	0	0.087037	4.55926	9.9537
AVERAGE	0	0	5.5	0	5.5				23.1463	18.6833	33.3556	26.0481	50.3926		8.77778	4	25.5556	0	0		0.0148148	0.0462963	0.0148148	2.53148	14.5389
S.D.	0	0	0.522233	0	0.522233				14.5833	14.3463	22.1185	35.9685	38.2204		2.11111	5	6.11111	0	0		0.0740741	0.0148148	0.0314815	2.98704	3.06111
									16.3722	16.6037	37.9167	15.9241	39.9111		3.44444	11.4444	21.1111	0	0		0.131481	0	0	0.275926	3.06111
									25.8037	29.6722	29.3148	46.587	41.1148		11.3333	6.66667	16.3333	0	0		0.209259	0.0407407	0.0722222	9.26296	0.0481481
									23.5185	26.1667	27.537	33.5574	39.8963		10.8889	11	12.3333	0	0		0.0314815	0.161111	0.37963	1.13148	0
									19.3444	42.0537	22.8389	26.8019	26.7574		5.44444	6.44444	8.33333	0	0		0	0	0.0722222	0.690741	2.78889
									13.4537	29.6556	21.0167	36.9259	32.5389		4.77778	9.22222	4.55556	0	0		0.062963	0.012963	0.0296296	5.86852	1.81296
									12.7407	22.9926	10.3574	40.9889	46.8204		4.77778	6.33333	1.22222	0	0		0	0.377778	0.172222	3.93704	0.514815
									2.43148	24.9167	24.4574	30.7944	29.3444		0	4.88889	8	0	0		0	0.425926	0.896296	2.3537	3.8
									24.5778	28.7167	20.0481	42.3148	35.7167		2.33333	5.44444	5.55556	0	0		1.02963	2.82407	0.62963	1.63148	2.96852
									14.0556	20.9796	4.66481	39.7093	15.8407		5.33333	0.111111	0.222222	0	0		0	0	0	6.5037	0.225926
									25.9667	16.4037	25.987	30.1759	36.3037		14.7778	0.666667	10.5556	0.444444	0		0.0203704	0.92963	0.553704	0.738889	0.364815
									10.9907	20.4556	20.4796	23.2611	19.1185		3.11111	0	0.333333	0	0		0	0.211111	0.275926	0.662963	2.39074
									3.61481	17.9611	19.3315	42.7685	40.9463		0	0.888889	8.88889	0	0		0	0	0.062963	1.74444	0
									6.90556	15.7889	12.6648	28.3741	34.2667		1.88889	3.22222	5.88889	0	0		0.0203704	1.59074	0.0148148	0.318519	1.6463
									8.92407	24.9259	29.7037	40.0593	29.7481		1.77778	0.888889	6.77778	0	0		0.181481	0.477778	0.0981481	6.04815	0.337037
									9.52222	11.3037	34.9741	23.3889	28.2722		4.44444	2.22222	1.11111	0	0		0	1.10556	3.04074	1.76296	0.464815
									15.5963	18.5	15.9056	21.7852	42.0722		3.77778	0.333333	3.22222	0	0		0	0.0240741	0	3.66852	0.440741
									19.6111	11.6389	22.2519	32.4296	37.4519		1.77778	0	3.88889	0	0		0	0.5	0.0148148	5.26296	3.82963
									15.5722	31.6926	18.063	27.4685	48.7519		2.22222	3.22222	5.11111	0	0		0.112963	2.36111	0.0203704	5.53333	7.21481
									20.7926	21.7074	32.8833	14.6019	31.7852		3.88889	6	2.44444	0	0		0.0611111	0	1.51111	0.0611111	1.28704
									22.7611	23.3185	27.1796				1.33333	6.44444	11.3333				2.32593	0.0777778	0.0703704
									16.687	32.9019	19.1204				2	3.77778	0.111111				0.0351852	0.622222	0
									14.5407	10.3444	18.5444				1.66667	0.555556	2.77778				0.0722222	0.0685185	0
									21.7833	41.6852	1.66296				9.55556	5.55556	0				0.359259	13.2037	0.12963
									21.3741	17.7611	31.1778				15.5556	1.33333	8.88889				0.0203704	0.118519	0.801852
									9.42407	22.8167	13.1981				0.333333	4.66667	5.22222				0.2	0.0833333	0.0333333
									12.363	18.0889	19.6167				6.11111	0.444444	9.33333				0	0.0185185	0
									5.62778	25.363	16.9204				0.666667	5	3.55556				0.168519	0.483333	0.287037
									9.68519	44.0333					1.77778	4					0.362963	5.74815
									19.5241	21.5074					4.11111	6.22222					0.012963	0
									35.7852	20.2463					3.44444	10.2222					3.71667	0.0703704
									31.4	47.6704					4.66667	9.11111					0.137037	15.287
									52.9833	20.4759					7.55556	1					8.48704	0
									31.2667	15.9					0.333333	1.22222					0	0.0611111
									17.7574	12.4333					4.44444	5.33333					0.012963	0
									21.4907	17.5463					2.88889	7.44444					0	0
									25.0963	21.4204					2.77778	0.222222					0.0685185	0.92037
									31.6759	23.6537					2.66667	1.66667					0.261111	0.972222
									22.5556	30.1574					14.2222	3.55556					0	0.52037
									30.45	24.7259					9.11111	3					0	0.153704
									18.2407	21.6148					7.22222	4.77778					0	0
									25.3741	13.2074					2.55556	1.66667					0	0.0259259
									25.9333						2.77778						1.4463
									24.0778						5.11111						0
									19.5426						3.55556						0
									20.9815						2.11111						0.627778
									32.8167						12.7778						0
									45.5352						19.4444						0.803704
									9.05						2.66667						0
									5.12593						0.111111						0.118519
									49.2407						0						2.69444
									24.9833						3.33333						0
									Across-genotype comparison			Across-genotype comparison			Across-genotype comparison			Across-genotype comparison			Across-genotype comparison			Across-genotype comparison
									Kruskal-Walis one-way ANOVA ('kruskalwallis')			Mann-Whitney U test ('ranksum')			Kruskal-Walis one-way ANOVA ('kruskalwallis')			Mann-Whitney U test ('ranksum')			Kruskal-Walis one-way ANOVA ('kruskalwallis')			Mann-Whitney U test ('ranksum')
									0.524873			+/+ vs. +/fru4-40			0.00900309			+/+ vs. +/fru4-40			0.0897663			+/+ vs. +/fru4-40
												0.0105315			Mann-Whitney U test ('ranksum')			0.329557						0.416579
															+/+ vs. +/fru4-40
															0.45268
															+/fru4-40 vs. fruM/fru4-40
															0.0033571

## Sheet: FigureS1-3C,E
Figure 1 - figure supplement 3
C (Tk-GAL4FruM neurons)							E (Tk-GAL4FruM neurons)
								Tk-GAL1, UAS>stop>CsChrimson (attP2), Otd-nls:FLPo		Tk-GAL1, UAS>stop>CsChrimson (attP2)			Tk-GAL1, UAS>stop>CsChrimson (VK00005)			Tk-GAL1, UAS>stop>CsChrimson (VK00005)
fru locus	+/+	fruF/+	fruF/fru4-40	fruM/+	fruM/fru4-40		fru locus	+/+		fruFLP/+			fruFLP/+			fruFLP/fru4-40
sex chromosome	XY	XY	XY	XX	XX			Total	FruM+	Total	FLP-	FLP+	Total	FLP-	FLP+	Total	FLP-	FLP+
	6	6	0	2	5		(Column #)	1		2			3			4
	6	5	0	2	5			6	6	4	2	2	6	0	6	3	0	3
	5	6	0	2	6			6	6	5	2	3	4	0	4	2	0	2
	5	5	0	1	4			6	6	6	2	4	6	0	5	2	0	2
	5	6	0	2	6			5	5	5	1	4	6	3	3	2	0	2
	5	5	0	1	5			5	5	6	2	4	5	0	5	3	0	3
	5	6	0	2	5			6	6	5	1	4	5	0	5	2	0	2
	6	6	0	2	6			6	6	4	2	2	6	0	6	1	0	1
				2				5	5	5	2	3	5	0	5	2	0	2
				1				6	6							4	0	4
AVERAGE	5.375	5.625	0	1.7	5.25			6	6							1	0	1
S.D.	0.517549	0.517549	0	0.483046	0.707107		AVERAGE	5.7	5.7	5	1.75	3.25	5.375	0.375	4.875	2.2	0	2.2
							S.D.	0.483046	0.483046	0.755929	0.46291	0.886405	0.744024	1.06066	0.991031	0.918937	0	0.918937
	One-way ANOVA ('anova1') among genotypes						One-way ANOVA ('anova1') among genotypes
	3.92156e-25						2.1935e-05
Tukey's honest significant difference test ('hsd'): p-value table							Tukey's honest significant difference test ('hsd'): p-value table
(Significant group, p < 0.01)	a	a	b	c	a		(Significant group, p < 0.01)	a	a	a	b
fru locus	+/+	fruF/+	fruF/fru4-40	fruM/+	fruM/fru4-40		Column	1	2	3	4
+/+		0.856059	9.92222e-09	9.92222e-09	0.987124		1		0.273732	0.153738	4.01162e-09
fruF/+			9.92222e-09	9.92222e-09	0.574015		2			0.989295	1.3634e-07
fruF/fru4-40				1.95621e-07	9.92222e-09		3				3.35334e-07
fruM/+					9.92222e-09		4
fruM/fru4-40

## Sheet: Figure2A,B
Figure 2
A1 (Time orienting (sec/min))							A2 (Lunges/minutes)							A3 (Wing extension (sec/min))							B1 (Time orienting (sec/min))							B2 (Lunges/minutes)							B3 (Wing extension (sec/min))
fruM ♀ Tk-GAL41, UAS>stop>CsChrimson, Otd-nls:FLPo				fruM ♀ Tk-GAL41, UAS>stop>CsChrimson	fruM ♀ UAS>stop>CsChrimson, Otd-nls:FLPo		fruM ♀ Tk-GAL41, UAS>stop>CsChrimson, Otd-nls:FLPo				fruM ♀ Tk-GAL41, UAS>stop>CsChrimson	fruM ♀ UAS>stop>CsChrimson, Otd-nls:FLPo		fruM ♀ Tk-GAL41, UAS>stop>CsChrimson, Otd-nls:FLPo				fruM ♀ Tk-GAL41, UAS>stop>CsChrimson	fruM ♀ UAS>stop>CsChrimson, Otd-nls:FLPo		fruM ♀ Tk-GAL41, UAS>stop>CsChrimson, Otd-nls:FLPo				fruM ♀ Tk-GAL41, UAS>stop>CsChrimson	fruM ♀ UAS>stop>CsChrimson, Otd-nls:FLPo		fruM ♀ Tk-GAL41, UAS>stop>CsChrimson, Otd-nls:FLPo				fruM ♀ Tk-GAL41, UAS>stop>CsChrimson, Otd-nls:FLPo				fruM ♀ Tk-GAL41, UAS>stop>CsChrimson	fruM ♀ UAS>stop>CsChrimson, Otd-nls:FLPo		fruM ♀ Tk-GAL41, UAS>stop>CsChrimson	fruM ♀ UAS>stop>CsChrimson, Otd-nls:FLPo
Window 1 (pre-stimulation)	Window 2 (during stimulation)	Window 3 (ISIs)	Window 4 (total post-stimulation)	Window 4 (total post-stimulation)	Window 4 (total post-stimulation)		Window 1 (pre-stimulation)	Window 2 (during stimulation)	Window 3 (ISIs)	Window 4 (total post-stimulation)	Window 4 (total post-stimulation)	Window 4 (total post-stimulation)		Window 1 (pre-stimulation)	Window 2 (during stimulation)	Window 3 (ISIs)	Window 4 (total post-stimulation)	Window 4 (total post-stimulation)	Window 4 (total post-stimulation)		Window 1 (pre-stimulation)	Window 2 (during stimulation)	Window 3 (ISIs)	Window 4 (total post-stimulation)	Window 4 (total post-stimulation)	Window 4 (total post-stimulation)		Window 1 (pre-stimulation)	Window 2 (during stimulation)	Window 3 (ISIs)	Window 4 (total post-stimulation)	Window 4 (total post-stimulation)	Window 4 (total post-stimulation)		Window 1 (pre-stimulation)	Window 2 (during stimulation)	Window 3 (ISIs)	Window 4 (total post-stimulation)	Window 4 (total post-stimulation)	Window 4 (total post-stimulation)
4.91667	17.7	33.025	27.9167	3.98704	15.4852		0	0	0	0	0	0		0	0	0	0	0.224074	0		4.63333	21.7444	7.04167	11.9426	20.5574	14.913		0	0	0	0	0	0		0	0	0.025	0.0166667	0	0
3.43333	31.6	27.375	28.7833	2.62963	6.92407		0	0	0	0	0	0		0	0	2.82778	1.88519	0	0.103704		7.9	42.7611	25.9389	31.5463	9.29815	18.7111		0	1.33333	0	0.444444	0	0		0	0	0	0	0	0.0240741
18.9833	3.48333	7.18611	5.95185	5.14815	17.8926		0	0	0	0	0	0		0	0	0.0277778	0.0185185	0.114815	0		5.23333	14.9389	7.74722	10.1444	13.0611	11.5648		0	0	0	0	0	0		0	0	0	0	0.398148	0.261111
6.31667	37.1	15.1833	22.4889	45.7259	30.6315		0	0	0	0	0	0		0	4.01667	0.583333	1.72778	0	1.90185		12.7667	40.1111	3.01111	15.3778	13.7278	29.8259		0	0	0	0	0	0		0	0	0	0	0.0185185	0
3.33333	59.5611	57.7972	58.3852	3.17037	6.94444		0	0	0	0	0	0		9.08333	2.93333	5.75833	4.81667	0	0		10.9333	44.1722	17.1667	26.1685	4.77407	13.25		0	0	0	0	0	0		0	0	0.141667	0.0944444	0	0
10.3	54.3111	31.15	38.8704	5.50926	20.6222		0	1.66667	0	0.555556	0	0		0	0	0	0	0	0		3.53333	4.69444	14.7778	11.4167	14.9722	16.6963		0	0	0	0	0	0		0	0	0	0	0	0
47.3167	53.1611	55.2083	54.5259	43.3963	43.8889		0	0	0	0	0	0		0.783333	1.77778	2.18056	2.0463	5.0963	0.138889		14.75	9.41667	12.675	11.5889	7.63704	16.2481		0	0	0	0	0	0		0	0	0	0	0	0
18.0667	14.5056	10.4722	11.8167	3.58148	7.99444		0	2	0	0.666667	0	0		0	0	0	0	0.0166667	1.01852		3.26667	10.1167	7.84444	8.60185	7.32778	15.8259		0	0	0	0	0	0		0	0	0.0277778	0.0185185	0	0
10.8833	2.42222	0.813889	1.35	15.1648	4.78889		0	0	0	0	0	0		0	0	0	0	0	0		17.7833	10.2833	10.8806	10.6815	31.1407	19.3759		0	0	0	0	0	0		0	0	0.130556	0.087037	0	0
3.2	8.9	9.28333	9.15556	8.82593	13.0074		0	1.33333	0	0.444444	0	0		0	0	0	0	0	0.292593		0.766667	27.8556	6.05556	13.3222	13.2593	11.2296		0	0	0	0	0	0		0	0	0	0	0	0
3.51667	12.7944	14.8972	14.1963	16.787	6.70926		0	0	0	0	0	0		0	0	0	0	0	0.0833333		1.38333	33.6278	16.9139	22.4852	17.8704	19.2519		0	0.333333	0	0.111111	0	0		0	0	0	0	0	0.0240741
15.75	8.95556	3.61667	5.3963	12.3204	8.50926		0	0	0	0	0	0		0	0.783333	0.0416667	0.288889	0	0.0296296		14.4	34.9333	18.7389	24.137	7.75185	9.01667		0	0	0	0	0	0		0	0.194444	0.0277778	0.0833333	0	0
8.11667	33.0944	17.2861	22.5556	50.3815	8.36667		0	1.33333	0	0.444444	0	0		0	0.0833333	1.93611	1.31852	1.20185	0		4.05	36.7222	51.0556	46.2778	23.7833	10.8685		0	0	0	0	0	0		0	0	0	0	0	0.107407
6.56667	27.5222	24.1944	25.3037	12.9056	17.6944		0	3.33333	0	1.11111	0	4.88889		0	0	0.786111	0.524074	0	0		0	26.9611	17.675	20.7704	18.7389	20.213		0	0	0	0	0	0		0.233333	1.24444	0.777778	0.933333	0	0.0296296
7.21667	17.1333	23.8917	21.6389	3.7537	8.50926		0	1.66667	0	0.555556	0	0		0	0	0	0	0.0240741	0		29	18.6389	17.5472	17.9111	28.6704	28.0667		0	1.66667	0	0.555556	0	0		0	0	0.025	0.0166667	0	0
9.8	9.36667	7.20278	7.92407	4.79259	19.3722		0	0.333333	0	0.111111	0	0		0	0	0	0	0	0.0740741		42.4167	31.3	4.69167	13.5611	3.98519	17.7426		0	0	0	0	0	0		0	0	0	0	0	0.0185185
34.8667	29.4889	35.3972	33.4278	11.6259	53.8093		0	0	0	0	0	0		2.71667	0	2.77222	1.84815	0.0333333	3.31481		9.75	15.5833	16.8306	16.4148	31.7296	5.53889		0	1.66667	0	0.555556	0	0		0	0	0	0	0	0
4.11667	33.0778	20.2056	24.4963	53.5519	28.3333		0	0	0	0	0	0		0.216667	5.62778	4.78056	5.06296	9.28519	0		5.51667	9.77778	8.50556	8.92963	37.1704	5.65		0	0	0	0	0	0		0	0	0	0	0.0388889	0
0.333333	12.95	12.4194	12.5963	53.3796	31.9537		0	1	0	0.333333	0	0		0	0	0.361111	0.240741	0.105556	7.23333		0	1.07222	9.76944	6.87037	10.5796	17.863		0	0	0	0	0	0		0	0	0	0	0	0
12.2667	26.6611	20.3444	22.45	3.96667	14.3333		1	11.3333	2.16667	5.22222	0	0		\	0	0.0277778	0.0185185	0	0.344444		6.33333	20.55	10.7556	14.0204	4.45926	14.2167		0	0	0	0	0	0		0	0	0.0777778	0.0518519	0	0
12.9	41.4667	38.2667	39.3333	37.0667	15.1537		0	0	0	0	0	0		3.56667	3.22222	11.1333	8.4963	6.78704	0		26.2833	38.8444	33.425	35.2315	28.7981	13.4611		0	0	0	0	0	0		0	0	0	0	0	0
0.266667	40.1944	7.44722	18.363	26.6019	38.3667		0	6.66667	0	2.22222	0	0		0	0	0	0	10.1278	13.9278		4.3	30.1667	18.025	22.0722	33.8944	9.98889		0	0.333333	0	0.111111	0	0		0	0	0.0444444	0.0296296	0	0
0	49.3556	38.2083	41.9241	41.013	6.00556		0	0.333333	0.166667	0.222222	0	0		0	0	0.144444	0.0962963	11.6907	0.037037		3.16667	47.4056	55.5361	52.8259	6.31667	11.2296		0	0	0	0	0	0		0	0.983333	1.02778	1.01296	0	0
18.0333	9.11667	20.75	16.8722	55.6167	26.1944		0	1.33333	0	0.444444	0	0		1.96667	0	3.875	2.58333	17.0019	0.787037		16.0333	42.7389	30.9944	34.9093	15.4907	18.3093		0	0	0	0	0	0		0	0	0	0	0	0
17.9833	19.0889	6.18611	10.487	14.4389	15.687		0	3.33333	0.333333	1.33333	0	0.111111		0	0	0.105556	0.0703704	0	0.368519		0	37.9222	19.7972	25.8389	22.35	13.8648		0	0	0	0	0	0		0	0.205556	0	0.0685185	0	0
0	37.0889	23.4833	28.0185	5.33148	12.863		0	0.333333	0.166667	0.222222	0	0		0	0	0.169444	0.112963	0	0.012963		14.45	41.2833	22.1083	28.5	21.6796	16.6556		0	2.66667	0	0.888889	0	0		0	0	0	0	0	0
7.01667	9.68889	7.03889	7.92222	7.57222	22.3352		0	0	0	0	0	0		0	0	0.0222222	0.0148148	0	0.0481481		6.88333	25.9444	28.4944	27.6444	3.86852	27.2389		0	0	0	0	0	0		0	0	0.625	0.416667	0	0.012963
1.61667	11.8667	6.13333	8.04444	4.30926	30.0704		0	0	0	0	0	0		0	0.638889	0	0.212963	0	0		3.45	25.5889	14.8944	18.4593	24.7685	18.9278		0	0	0	0	0	0		0	0	0.0361111	0.0240741	0	0
0	19.0833	4.37778	9.27963	8.80185	5.46481		0	1	0	0.333333	0	0		0	0	0	0	0.494444	0		7.8	21.4556	27.2	25.2852	17.7444	10.0574		0	0	0	0	0	0		0	0.0388889	1.35	0.912963	0	0
0.45	10.5611	18.4361	15.8111	4.6	20.7815		0	0	0	0	0	0		0	0	0.0444444	0.0296296	0	0.0722222		8.13333	32.7833	36.7694	35.4407	9.14444	9.66852		0	0	0	0	0	0		0.25	0	4.38333	2.92222	0.0555556	0.0277778
1	35.2667	5.93611	15.713	27.1981	44.8833		0	2	0	0.666667	0	0		0	0.05	0	0.0166667	0	2.72778		11.0667	51.0778	38.4556	42.663	23.1833	15.7222		0	0.333333	0	0.111111	0	0		0	1.68889	0.938889	1.18889	0	0
2.45	32.9778	11.1917	18.4537	1.98333	8.32407		0	25.6667	0.5	8.88889	0	0		0	0	0	0	0	0						13.1685	13.8574						0	0						0	0.164815
7.13333	11.1667	8.35556	9.29259	5.38333	50.0611		0	1.33333	0	0.444444	0	0		0	0	0	0	0	5.72778						13.387							0							0
9.73333	16.6056	7.97222	10.85	11.5019	36.9944		0	3	0	1	0	0		0	0	0	0	0	6.2
13.6333	48.9833	24.8222	32.8759	7.37778	17.8889		0	0.666667	0	0.222222	0	0.111111		0	1.73889	1.28333	1.43519	0	0
54.6333	59.4111	49.9389	53.0963	38.2944	36.1056		0	0	0	0	0	0		0	0.0777778	2.31389	1.56852	7.33704	0.438889
11.55	18.6167	8.37778	11.7907	7.59444	48.8111		0	7.66667	0.333333	2.77778	0	0		0	0	0	0	0	5.24259
2.86667	24.9222	33.3972	30.5722	9.87407	15.7889		0	0.666667	0	0.222222	0	0		0	0	4.925	3.28333	0	0.338889
35.4167	44.1111	45.6472	45.1352	6.7037			0	0	0	0	0			9.08333	1.11667	7.65833	5.47778	0.0185185
15.45	14.7056	8.00278	10.237	4.38148			0	1.33333	0	0.444444	0			0	0	0.0666667	0.0444444	0
Within genotype Tk-GAL41, UAS>stop>CsChrimson, Otd-nls:FLPo:							Within genotype Tk-GAL41, UAS>stop>CsChrimson, Otd-nls:FLPo:							Within genotype Tk-GAL41, UAS>stop>CsChrimson, Otd-nls:FLPo:							Within genotype Tk-GAL41, UAS>stop>CsChrimson, Otd-nls:FLPo:							Within genotype Tk-GAL41, UAS>stop>CsChrimson, Otd-nls:FLPo:							Within genotype Tk-GAL41, UAS>stop>CsChrimson, Otd-nls:FLPo:
Statistical comparisons among time windows 1-3							Statistical comparisons among time windows 1-3							Statistical comparisons among time windows 1-3							Statistical comparisons among time windows 1-3							Statistical comparisons among time windows 1-3							Statistical comparisons among time windows 1-3
Kruskal-Walis one-way ANOVA ('kruskalwallis') among windows 1-3							Kruskal-Walis one-way ANOVA ('kruskalwallis') among windows 1-3							Kruskal-Walis one-way ANOVA ('kruskalwallis') among windows 1-3							Kruskal-Walis one-way ANOVA ('kruskalwallis') among windows 1-3							Kruskal-Walis one-way ANOVA ('kruskalwallis') among windows 1-3							Kruskal-Walis one-way ANOVA ('kruskalwallis') among windows 1-3
5.89463e-06							4.77428e-09							0.00254823							4.83571e-07							0.000567225							0.00118519
Wilcoxon signed rank test ('signrank')							Wilcoxon signed rank test ('signrank')							Wilcoxon signed rank test ('signrank')							Wilcoxon signed rank test ('signrank')							Wilcoxon signed rank test ('signrank')							Wilcoxon signed rank test ('signrank')
1 vs. 2	2 vs. 3						1 vs. 2	2 vs. 3						1 vs. 2	2 vs. 3						1 vs. 2	2 vs. 3						1 vs. 2	2 vs. 3						1 vs. 2	2 vs. 3
9.77069e-06	0.00158472						2.6187e-05	2.62718e-05						0.977966	0.0175581						1.93687e-05	0.00308561						0.015625	0.015625						0.109375	0.27745
Across-genotype comparison							Across-genotype comparison							Across-genotype comparison							Across-genotype comparison							Across-genotype comparison							Across-genotype comparison
Kruskal-Walis one-way ANOVA ('kruskalwallis')							Kruskal-Walis one-way ANOVA ('kruskalwallis')							Kruskal-Walis one-way ANOVA ('kruskalwallis')							Kruskal-Walis one-way ANOVA ('kruskalwallis')							Kruskal-Walis one-way ANOVA ('kruskalwallis')							Kruskal-Walis one-way ANOVA ('kruskalwallis')
0.014469							1.74355e-10							0.172173							0.0657683							0.000401575							0.0015218
Mann-Whitney U test ('ranksum')							Mann-Whitney U test ('ranksum')																					Mann-Whitney U test ('ranksum')							Mann-Whitney U test ('ranksum')
Tk-GAL41, UAS>stop>CsChrimson, Otd-nls:FLPo vs. Tk-GAL41, UAS>stop>CsChrimson							Tk-GAL41, UAS>stop>CsChrimson, Otd-nls:FLPo vs. Tk-GAL41, UAS>stop>CsChrimson																					Tk-GAL41, UAS>stop>CsChrimson, Otd-nls:FLPo vs. Tk-GAL41, UAS>stop>CsChrimson							Tk-GAL41, UAS>stop>CsChrimson, Otd-nls:FLPo vs. Tk-GAL41, UAS>stop>CsChrimson
0.0100524							3.09912e-08																					0.00434822							0.000595894
Tk-GAL41, UAS>stop>CsChrimson, Otd-nls:FLPo vs. UAS>stop>CsChrimson, Otd-nls:FLPo							Tk-GAL41, UAS>stop>CsChrimson, Otd-nls:FLPo vs. UAS>stop>CsChrimson, Otd-nls:FLPo																					Tk-GAL41, UAS>stop>CsChrimson, Otd-nls:FLPo vs. UAS>stop>CsChrimson, Otd-nls:FLPo							Tk-GAL41, UAS>stop>CsChrimson, Otd-nls:FLPo vs. UAS>stop>CsChrimson, Otd-nls:FLPo
0.75284							3.5353e-06																					0.0049541							0.0293562

## Sheet: FIgure2C
Figure 2
C (percentage of lunging testers)
Tester	♂ Tk-GAL41, UAS>stop>CsChrimson, Otd-nls:FLPo	♂ Genetic controls	♂ Tk-GAL41, UAS>stop>CsChrimson, Otd-nls:FLPo	♂ Genetic controls		Tester	fruM ♀ Tk-GAL41, UAS>stop>CsChrimson, Otd-nls:FLPo	fruM ♀ Genetic controls	fruM ♀ Tk-GAL41, UAS>stop>CsChrimson, Otd-nls:FLPo	fruM ♀ Genetic controls
Target	Wild-type ♂		Wild-type ♀			Target	Wild-type ♂		Wild-type ♀
% Tester lunging	96.3	7.6	3.1	0		% Tester lunging	57.5	3.8	22.6	0
Tester lunged	52	8	1	0		Tester lunged	23	3	7	0
Tester not lunged	2	97	31	64		Tester not lunged	17	75	24	65
	Fisher's exact test ('fishertest')		Fisher's exact test ('fishertest')				Fisher's exact test ('fishertest')		Fisher's exact test ('fishertest')
	1.05473e-30		0.333333				7.434e-11		0.000220617

## Sheet: FigureS2-1A,B
Figure 2 - figure supplement 1
Wild type ♀ ("Tester") behavior						♂ ("Target") behavior
A1 (Time orienting (sec/min))			A2 (Headbutts/min)			B1 (Time orienting (sec/min))			B2 (Wing extension (sec/min))
Target: ♂	Target: fruF ♂		Target: ♂	Target: fruF ♂		Target: ♂	Target: fruF ♂		Target: ♂	Target: fruF ♂
0	15.6759		0	0.666667		35.9926	19.3722		0.505556	0
2.39259	18.0056		0.333333	0.222222		14.8481	17.2074		1.63148	0.0648148
6.23704	3.41481		1.11111	0.777778		8.84074	8.78148		19.8148	0
5.65	0.538889		0.111111	0		30.3019	1.54815		2.88889	0
3.03519	12.3407		0.111111	0.222222		17.2241	6.2463		1.18148	0
11.413	2.8		0	0.333333		5.95741	5.83148		1.23889	0.116667
4.14444	7.25556		0	1.22222		15.6963	8.17593		28.4389	0.124074
8.35185	13.0093		0.111111	0.666667		39.4833	4.12778		33.4907	0.0222222
3.16481	1.27778		0.111111	0		56.6704	0.316667		1.32407	0
2.14074	0.694444		0.222222	0		11.6796	1.74815		34.7519	0
1.73519	9.56481		0	0.111111		51.9074	4.71852		32.7463	2.21296
4.58333	12.4815		0	0.111111		46.4593	10.9259		20.8667	0
2.82407	11.0963		0.111111	0.222222		35.8759	14.2907		0.753704	0
2.02778	16.6167		0	0.666667		15.4185	1.93889		32.8204	0
7.85556	1.66852		0	0.222222		51.2833	4.12593		1.77778	0
4.96481	6.31852		0.777778	0.444444		17.3278	5.68148		34.7796	0
3.30741	13.0185		0.111111	0		45.6093	5.82222		21.0852	0
6.6	2.32593		0	0.444444		36.0759	6.16852		36.3815	0.0203704
2.37778	20.2204		0.111111	0.111111		43.2852	3.75926		5.38519	0
3.56296	23.1463		0	1		31.7611	13.0944		13.4444	0.0185185
6.15185	2.45185		0.111111	0		32.2648	4.26852		35.0093	0.211111
6.69074	9.31111		0	0		45.0074	11.6093		3.87593	0
1.80926	8.86667		0.111111	0.111111		26.2259	16.1111		2.91667	0.281481
13.4333	18.6889		0.222222	0.333333		15.6685	22.8648
Target ♂ vs. target fruF ♂ comparison			Target ♂ vs. target fruF ♂ comparison			Target ♂ vs. target fruF ♂ comparison			Target ♂ vs. target fruF ♂ comparison
Mann-Whitney U test ('ranksum')			Mann-Whitney U test ('ranksum')			Mann-Whitney U test ('ranksum')			Mann-Whitney U test ('ranksum')
0.0266496			0.0301388			6.37007e-07			4.25999e-09

## Sheet: FigureS2-3A,B
Figure 2 - figure supplement 3
	A							B
	Tester (ts): fruM ♀ Tk-GAL41, UAS>stop>CsChrimson, Otd-nls:FLPo	Target (tg): fruF ♂	Tester (ts): fruM ♀ Tk-GAL41, UAS>stop>CsChrimson	Target (tg): fruF ♂	Tester (ts): fruM ♀ UAS>stop>CsChrimson, Otd-nls:FLPo	Target (tg): fruF ♂		Tester (ts): fruM ♀ Tk-GAL41, UAS>stop>CsChrimson, Otd-nls:FLPo	Target (tg): Wild type ♀	Tester (ts): fruM ♀ Tk-GAL41, UAS>stop>CsChrimson	Target (tg): Wild type ♀	Tester (ts): fruM ♀ UAS>stop>CsChrimson, Otd-nls:FLPo	Target (tg): Wild type ♀
	Lunges/minutes	Headbutts/minutes	Lunges/minutes	Headbutts/minutes	Lunges/minutes	Headbutts/minutes		Lunges/minutes	Headbutts/minutes	Lunges/minutes	Headbutts/minutes	Lunges/minutes	Headbutts/minutes
	Window 4 (total post-stimulation)	Window 4 (total post-stimulation)	Window 4 (total post-stimulation)	Window 4 (total post-stimulation)	Window 4 (total post-stimulation)	Window 4 (total post-stimulation)		Window 4 (total post-stimulation)	Window 4 (total post-stimulation)	Window 4 (total post-stimulation)	Window 4 (total post-stimulation)	Window 4 (total post-stimulation)	Window 4 (total post-stimulation)
	0	0	0	0	0	0.111111		0	0.666667	0	0.777778	0	0.666667
	0	0	0	0	0	0		0.444444	0.555556	0	0.777778	0	0.888889
	0	0	0	0.111111	0	0		0	0.222222	0	0.222222	0	0
	0	0	0	0	0	0.333333		0	0.666667	0	2.55556	0	1.88889
	0	0	0	0	0	0.111111		0	0	0	0.444444	0	0.666667
	0.555556	0	0	0.111111	0	0.555556		0	1	0	0.444444	0	1.55556
	0	0.111111	0	0	0	0		0	0.888889	0	0.888889	0	0.555556
	0.666667	0	0	0.333333	0	0.111111		0	1.44444	0	0.444444	0	1.22222
	0	0	0	0.111111	0	0		0	0.222222	0	0.444444	0	1.22222
	0.444444	0	0	0.222222	0	0		0	0.444444	0	0.888889	0	1.11111
	0	0	0	0	0	0		0.111111	1.44444	0	2.11111	0	1
	0	0	0	0	0	0		0	1.77778	0	0.888889	0	0.888889
	0.444444	0	0	0.111111	0	0		0	0.111111	0	0.555556	0	1.11111
	1.11111	0	0	0	4.88889	0.111111		0	0.888889	0	0.888889	0	0.777778
	0.555556	0	0	0.111111	0	0		0.555556	0.333333	0	1.55556	0	0.555556
	0.111111	0	0	0	0	0		0	0.666667	0	0.222222	0	0.444444
	0	0	0	0.111111	0	0.888889		0.555556	0.666667	0	0	0	0.333333
	0	0	0	0	0	0		0	0.444444	0	0.222222	0	0.111111
	0.333333	0	0	0.333333	0	0		0	0	0	0.111111	0	1
	5.22222	0	0	0	0	0		0	0.111111	0	0.111111	0	1.11111
	0	0	0	0	0	0.888889		0	0.333333	0	0.555556	0	0.222222
	2.22222	0	0	0	0	0		0.111111	0.111111	0	1.11111	0	0
	0.222222	0	0	0	0	0		0	0	0	0.111111	0	1.22222
	0.444444	0	0	0	0	0		0	1.33333	0	0.333333	0	1.44444
	1.33333	0.666667	0	0	0.111111	0		0	0.777778	0	1	0	1.55556
	0.222222	0	0	0	0	0		0.888889	1.33333	0	0.111111	0	0.666667
	0	0	0	0.222222	0	0.111111		0	0.333333	0	0.333333	0	0.333333
	0	0	0	0.111111	0	0		0	0.222222	0	0.666667	0	0.888889
	0.333333	0	0	1.77778	0	0.444444		0	0.444444	0	0.777778	0	0.555556
	0	0	0	0.222222	0	0		0	0.222222	0	1.44444	0	1.22222
	0.666667	0	0	0.222222	0	0.222222		0.111111	0.888889	0	0.666667	0	1.22222
	8.88889	0	0	0.333333	0	0				0	1.55556	0	0.333333
	0.444444	0	0	0.111111	0	0.111111				0	0.111111
	1	0	0	0.111111	0	0
	0.222222	0.111111	0	0	0.111111	0
	0	0	0	0	0	0.222222		Tester vs. target comparison		Tester vs. target comparison		Tester vs. target comparison
	2.77778	0.111111	0	0	0	0.111111
	0.222222	0	0	0.111111	0	0.222222		Wilcoxon signed rank test ('signrank')		Wilcoxon signed rank test ('signrank')		Wilcoxon signed rank test ('signrank')
	0	0	0	0.333333				1.49448e-05		7.72699e-07		1.68907e-06
	0.444444	0.333333	0	0
	Tester vs. target comparison		Tester vs. target comparison		Tester vs. target comparison
	Wilcoxon signed rank test ('signrank')		Wilcoxon signed rank test ('signrank')		Wilcoxon signed rank test ('signrank')
	2.44191e-05		9.75254e-05		0.0154804

## Sheet: FigureS2-3C
Figure 2 - figure supplement 3
C1 (Time orienting (sec/min))											C2 (Lunges/minutes)											C3 (Wing extension (sec/min))
fruM ♀ Tk-GAL41 (hetero), UAS>stop>CsChrimson, Otd-nls:FLPo (Group-housed)				fruM ♀ Tk-GAL41 (hetero), UAS>stop>CsChrimson (Group-housed)	fruM ♀ Tk-GAL41 (hetero), UAS>stop>CsChrimson, Otd-nls:FLPo (Group-housed)				fruM ♀ Tk-GAL41 (hetero), UAS>stop>CsChrimson (Group-housed)		fruM ♀ Tk-GAL41 (hetero), UAS>stop>CsChrimson, Otd-nls:FLPo (Group-housed)				fruM ♀ Tk-GAL41 (hetero), UAS>stop>CsChrimson (Group-housed)	fruM ♀ Tk-GAL41 (hetero), UAS>stop>CsChrimson, Otd-nls:FLPo (Group-housed)				fruM ♀ Tk-GAL41 (hetero), UAS>stop>CsChrimson (Group-housed)		fruM ♀ Tk-GAL41 (hetero), UAS>stop>CsChrimson, Otd-nls:FLPo (Group-housed)				fruM ♀ Tk-GAL41 (hetero), UAS>stop>CsChrimson (Group-housed)	fruM ♀ Tk-GAL41 (hetero), UAS>stop>CsChrimson, Otd-nls:FLPo (Group-housed)				fruM ♀ Tk-GAL41 (hetero), UAS>stop>CsChrimson (Group-housed)
Window 1 (pre-stimulation)	Window 2 (during stimulation)	Window 3 (ISIs)	Window 4 (total post-stimulation)	Window 4 (total post-stimulation)	Window 1 (pre-stimulation)	Window 2 (during stimulation)	Window 3 (ISIs)	Window 4 (total post-stimulation)	Window 4 (total post-stimulation)		Window 1 (pre-stimulation)	Window 2 (during stimulation)	Window 3 (ISIs)	Window 4 (total post-stimulation)	Window 4 (total post-stimulation)	Window 1 (pre-stimulation)	Window 2 (during stimulation)	Window 3 (ISIs)	Window 4 (total post-stimulation)	Window 4 (total post-stimulation)		Window 1 (pre-stimulation)	Window 2 (during stimulation)	Window 3 (ISIs)	Window 4 (total post-stimulation)	Window 4 (total post-stimulation)	Window 1 (pre-stimulation)	Window 2 (during stimulation)	Window 3 (ISIs)	Window 4 (total post-stimulation)	Window 4 (total post-stimulation)
3.66667	28.7111	28.7917	28.7648	41.8463	51.7667	57.0556	57.0111	57.0259	33		0	6	0.333333	2.22222	0	0	0	0	0	0		0	0	0	0	0	10.1667	10.2389	11.8556	11.3167	0.0574074
15.8167	36.0056	23.275	27.5185	30.7296	53.6333	49.0389	52.1806	51.1333	36.6667		0	8.33333	0.5	3.11111	0	0	0	0	0	0		0	0	0.130556	0.087037	0.0259259	16.15	2.83889	3.42222	3.22778	0.424074
4.18333	38.3944	27.5778	31.1833	42.2907	3.73333	47.8444	43.7167	45.0926	48.5759		0	4.66667	0.5	1.88889	0	0	0	0	0	0		0	0.583333	1.21944	1.00741	0.468519	0	0.955556	2.11389	1.72778	0.953704
27.1333	40.3833	35.7806	37.3148	17.2519	55.45	55.3944	55.7556	55.6352	55.8296		0	0	0	0	0	0	0	0	0	0		0	0.0777778	0	0.0259259	0.133333	6.36667	1.85556	4.93889	3.91111	13.8352
1.53333	44.9222	31.9083	36.2463	31.8852	18.4833	41.3667	49.8	46.9889	3.93148		0	0.666667	0.666667	0.666667	0	0	0	0	0	0		0	0	0	0	0.0148148	2.65	3.1	3.62778	3.45185	0
9.1	31.7	7.63333	15.6556	24.2537	33.1833	36.8667	47.0778	43.6741	40.7333		0	9	3.5	5.33333	0	0	0	0	0	0		0	0	0	0	1.53519	11.2667	14.45	9.77222	11.3315	0.340741
39.8	37.0722	24.9083	28.963	6.5963	0	32.8111	39.7361	37.4278	40.863		0	3.66667	0.666667	1.66667	0	0	0	0	0	0		0	0.211111	1.89444	1.33333	0	1.9	0.0444444	0.302778	0.216667	0.346296
2.21667	23.1611	6.48333	12.0426	5.01111	57.9333	31.9333	43.1639	39.4204	54.463		0	0	0	0	0	0	0	0	0	0		0	0.05	0	0.0166667	0	2.66667	2.13333	2.93333	2.66667	0.424074
50.6	53.9111	34.6139	41.0463	4.99074	27.4333	45.3722	50.9194	49.0704	47.7296		0	0	0	0	0	0	0	0	0	0		6.68333	7.70556	5.96667	6.5463	0	4.93333	9.47778	17.7167	14.9704	3.65741
25.9333	34.6722	36.2556	35.7278	22.7593	40.2833	57.5556	54.9472	55.8167	47.0704		6	12.6667	3.5	6.55556	0	0	0	0	0	0		0	0.1	0	0.0333333	0	0	2.86111	5.93889	4.91296	6.8037
0.233333	39.6056	17.3528	24.7704	28.9074	0	53.0667	59.2056	57.1593	45.9444		0	6.33333	0.5	2.44444	0	0	0	0	0	0		0	3.02778	0.438889	1.30185	0.114815	0	1.66667	11.0611	7.92963	0.588889
47.6	51.4389	48.3083	49.3519	25.2056	40.1333	55.2833	52.2528	53.263	48.4148		0	0	0	0	0	0	0	0	0	0		0	0.338889	1.64167	1.20741	0	0	7.81667	8.54444	8.30185	1.04815
11.2333	31.95	43.6028	39.7185	13.8204	54.9	58.0278	48.3278	51.5611	6.77037		0	0.333333	0	0.111111	0	0	0	0	0	0.111111		0	0	0.411111	0.274074	0.0222222	0	3.32222	4.41111	4.04815	0.0240741
54.6167	36.2278	40.875	39.3259	28.1389	46.3833	51.4111	59.8639	57.0463	39.887		0	0	0	0	0	0	0	0	0	0		0	0	0.625	0.416667	4.24074	0	1.87222	1.67778	1.74259	0.185185
5.55	49.8111	38.0444	41.9667	27.9907	50.0667	32.1389	48.8389	43.2722	45.9889		0	0	0	0	0	0	0	0	0	0		0	3.78889	6.51944	5.60926	0	6.36667	8.61667	9.9	9.47222	7.52407
55.0167	47.7222	22.625	30.9907	5.80185	12.3833	57.8833	57.3222	57.5093	35.8796		0	1	1.66667	1.44444	0.666667	0	0	0	0	0		0	0	0	0	0	18.85	12.0833	9.55833	10.4	2.46296
13.2	23.7833	12.3139	16.137	40.0204	27.9	50.6222	52.7833	52.063	55.7741		0	0	0	0	0	0	0	0	0	0		0	0	0	0	4.81481	4.1	0.155556	1.45556	1.02222	5.93704
1.58333	34.4611	49.0722	44.2019	10.6037	14.3833	33.6667	40.7528	38.3907	40.9667		0	0	0	0	0	0	0	0	0	0		0	2.52778	2.69722	2.64074	0.335185	5.26667	1.58889	2.30556	2.06667	5.27407
53.05	10.7278	8.575	9.29259	18.5315	14.8833	52.4611	50.5278	51.1722	17.0759		0	0	0	0	0	0	0	0	0	0		11.9167	1.93333	0.805556	1.18148	0.0185185	0.466667	0.705556	0.611111	0.642593	0.305556
10.5667	7.83333	14.2333	12.1	6.72407	5.46667	53.2	53.0528	53.1019	45.1704		0	0	0	0	0	0	0	0	0	0		0	0.244444	0.169444	0.194444	0	0	0.722222	1.18611	1.03148	0.12037
14.6167	21.0111	17.4444	18.6333	26.5981							0	0	0	0	0							0	0.311111	1.96111	1.41111	0
18.65	18.9556	11.0222	13.6667	26.5722							0	1.33333	0	0.444444	0							0	0	0.0333333	0.0222222	0.0481481
6.15	20.1222	12.2	14.8407	29.1852	Within genotype Tk-GAL41, UAS>stop>CsChrimson, Otd-nls:FLPo:						0	0	0	0	0	Within genotype Tk-GAL41, UAS>stop>CsChrimson, Otd-nls:FLPo:						0	1.28889	0.388889	0.688889	1.99259	Within genotype Tk-GAL41, UAS>stop>CsChrimson, Otd-nls:FLPo:
13.0167	13.6889	11.35	12.1296	14.0185	Statistical comparisons among time windows 1-3						0	0	0	0	0	Statistical comparisons among time windows 1-3						0	0	0	0	0.0240741	Statistical comparisons among time windows 1-3
11.2333	19.6889	24.7361	23.0537	6.91667							0	0	0	0	0							0	0	0.138889	0.0925926	0.181481
6.98333	12.9222	9.09167	10.3685	1.66481	Kruskal-Walis one-way ANOVA ('kruskalwallis') among windows 1-3						0	0	0	0	0	Kruskal-Walis one-way ANOVA ('kruskalwallis') among windows 1-3						0	0	0.0277778	0.0185185	0	Kruskal-Walis one-way ANOVA ('kruskalwallis') among windows 1-3
7.3	4.38889	3.52222	3.81111	50.8352	0.00340129						0	0	0	0	0	N/A						0	0	0	0	1.89444	0.324153
20.7333	19.7833	12.4667	14.9056	32.0315	Wilcoxon signed rank test ('signrank')						0	0	0	0	0							0	0	0.0222222	0.0148148	1.97222
41.1	22.4056	23.575	23.1852	23.7241	1 vs. 2	2 vs. 3					0	0	0	0	0							0	0.205556	0.947222	0.7	0
4.33333	14.1056	14.7722	14.55	6.78333	0.0040452	0.0569146					0	0	0	0	0							0	0	0	0	0.407407
54.0667	42.8667	34.3472	37.187	12.713							0	0	0	0	0							0	0.8	0.713889	0.742593	0
14.35	36.9778	19.3583	25.2315	27.6185							0	0.666667	0	0.222222	0							0	0	0	0	1.50556
36.85	50.8444	53.125	52.3648	5.85741	Between-genotype comparison						0	0	0	0	0	Between-genotype comparison						0	19.45	9.44167	12.7778	0	Between-genotype comparison
4.38333	51.6778	37.3667	42.137	30.513	Mann-Whitney U test ('ranksum')						0	0	0	0	0	Mann-Whitney U test ('ranksum')						6.45	17.0944	6.63889	10.1241	0.235185	Mann-Whitney U test ('ranksum')
28.65	48.6444	45.0306	46.2352	33.0241	4.76232e-05						0	0	0	0	0	0.342112						4.71667	12.0167	11.2167	11.4833	4.43148	0.00557479
37.4667	50.4944	43.4833	45.8204	26.2556							0	0	0	0	0							10.3167	15.1	11.5167	12.7111	0.47963
4.25	27.0667	14.3389	18.5815	57.5907							0	22.6667	3.16667	9.66667	0							0	0.138889	0.666667	0.490741	0
7.21667	49.7	23.5306	32.2537	19.3907							0	1.33333	0.166667	0.555556	0							0	2.66111	1.78056	2.07407	0.0777778
1.83333	49.6056	48.4056	48.8056	9.92407							0	0	0	0	0							0	3.88333	5.33056	4.84815	0.1
2	20.6889	7.34444	11.7926	11.0556							0	10.3333	0.166667	3.55556	0							0	0	0.133333	0.0888889	0.455556
12.9833	22.2	35.5111	31.0741	23.2111							0	0	0	0	0							0	0.766667	3.01111	2.26296	0.961111
40.2167	36.9944	23.9139	28.2741	26.7056							0	0	0	0	0							0.85	0.455556	1.48056	1.13889	2.72778
58.6	49.1278	39.0833	42.4315	15.1407							0	0	0	0	0							3.13333	0.1	0	0.0333333	0.494444
55.4333	53.0667	58.0778	56.4074	20.6667							0	0	0	0	0							15.0333	6.40556	10.025	8.81852	0.125926
40.0333	25.2833	52.6333	43.5167	32.4778							0	0	0	0	0							3.21667	2.79444	2.43333	2.5537	0.568519
1.03333	28.4667	12.7333	17.9778	9.32963							0	0.333333	0	0.111111	0							0	0.455556	0	0.151852	0
22.3333	9.35	9.93611	9.74074	24.0111							0	0	0	0	0							0	0	0	0	0.648148
19.95	33.9167	29.3778	30.8907	42.5241							0	0	0	0	0							0	0	0.138889	0.0925926	1.09259
6.91667	9.18333	12.9	11.6611	37.5741							0	0	0	0	0							0	0	0	0	4.47037
12.4167	15.7778	18.2139	17.4019								0	0	0	0								0	0.361111	0.922222	0.735185
7.9	9.77778	6.29167	7.4537								0	0	0	0								0	0	0	0
21.2667	18.95	20.8833	20.2389								0	0	0	0								1.1	0	1.1	0.733333
17.4167	17.9611	17.8111	17.8611								0	0	0	0								0	0.133333	0.422222	0.325926
0	19.9056	10.0361	13.3259								0	4	0	1.33333								0.2	0	0.397222	0.264815
4.61667	9.83333	9.81389	9.82037								0	1	0.333333	0.555556								0	0	0.0944444	0.062963
7.73333	9.98333	8.01667	8.67222								0	1	0	0.333333								0	0	0	0
6.33333	7.12222	5.21111	5.84815								0	0.333333	0	0.111111								0	0	0	0
Within genotype Tk-GAL41, UAS>stop>CsChrimson, Otd-nls:FLPo:											Within genotype Tk-GAL41, UAS>stop>CsChrimson, Otd-nls:FLPo:											Within genotype Tk-GAL41, UAS>stop>CsChrimson, Otd-nls:FLPo:
Statistical comparisons among time windows 1-3											Statistical comparisons among time windows 1-3											Statistical comparisons among time windows 1-3
																																		Group-housed		Single-housed
Kruskal-Walis one-way ANOVA ('kruskalwallis') among windows 1-3											Kruskal-Walis one-way ANOVA ('kruskalwallis') among windows 1-3											Kruskal-Walis one-way ANOVA ('kruskalwallis') among windows 1-3											Tester	fruM ♀ Tk-GAL41 (hetero), UAS>stop>CsChrimson, Otd-nls:FLPo (Group-housed)	fruM ♀ Tk-GAL41 (hetero), UAS>stop>CsChrimson (Group-housed)	fruM ♀ Tk-GAL41 (hetero), UAS>stop>CsChrimson, Otd-nls:FLPo (Group-housed)	fruM ♀ Tk-GAL41 (hetero), UAS>stop>CsChrimson (Group-housed)
0.000794319											2.86935e-05											0.000109484											Tester lunged	20	1	0	0
Wilcoxon signed rank test ('signrank')											Wilcoxon signed rank test ('signrank')											Wilcoxon signed rank test ('signrank')											Tester not lunged	37	48	20	20
1 vs. 2	2 vs. 3										1 vs. 2	2 vs. 3										1 vs. 2	2 vs. 3											Fisher's exact test ('fishertest')
0.000103928	0.000425566										8.73264e-05	0.000289261										0.0114617	0.310433											1.1699e-05		1
Between-genotype comparison					Group- vs. single-housed comparison						Between-genotype comparison					Group- vs. single-housed comparison						Between-genotype comparison					Group- vs. single-housed comparison
Mann-Whitney U test ('ranksum')					Mann-Whitney U test ('ranksum')						Mann-Whitney U test ('ranksum')					Mann-Whitney U test ('ranksum')						Mann-Whitney U test ('ranksum')					Mann-Whitney U test ('ranksum')
0.233536					1.38799e-08						2.54201e-05					1.38799e-08						0.216053					1.27903e-05

[truncated: 10 more sheets: FigureS2-3D-F, Figure3B,C, Figure3D,E, FigureS3-1C, E, Figure4B,C, FigureS4-1A,B, FigureS4-1C-E, Figure5, Figure6C,D, Figure6E-G]
